# Supplementary material for: A novel bottom-up solvothermal synthesis of carbon nanosheets
Source: Royal Society of Chemistry journal article supplement (doi:10.1039/c3ta13593d), 2013-12-03
Supplement: c3ta13593d.pdf [file c3ta13593d.pdf]

## Supporting Information

# A Novel Bottom-up Solvothermal Synthesis of Carbon Nanosheets

Wentai Wang,<sup>a,b</sup> Sandip Chakrabarti,<sup>c</sup> Zhigang Chen,<sup>d</sup> Zifeng Yan,<sup>b</sup> Moses O. Tade,<sup>e</sup> Jin Zou<sup>d,f</sup> and Qin Li\*<sup>a</sup>

<sup>a</sup> Queensland Micro- and Nanotechnology Centre, Griffith University Nathan Campus, Brisbane, Australia. Fax: 61 7 555 28226; Tel: 61 7 3735 7514; E-mail: qin.li@griffith.edu.au

<sup>b</sup> State Key Laboratory of Heavy Oil Processing Key Laboratory of CNPC, China University of Petroleum, Qingdao, China.

<sup>c</sup> Amity Institute of Nanotechnology, Amity University Uttar Pradesh, Noida, India.

<sup>d</sup> Materials Engineering, the University of Queensland, St Lucia, QLD 4072, Australia.

<sup>e</sup> Department of Chemical Engineering, Curtin University, Bentley, WA 6845, Australia.

<sup>f</sup> Centre for Microscopy and Microanalysis, the University of Queensland, St Lucia, QLD 4072, Australia.

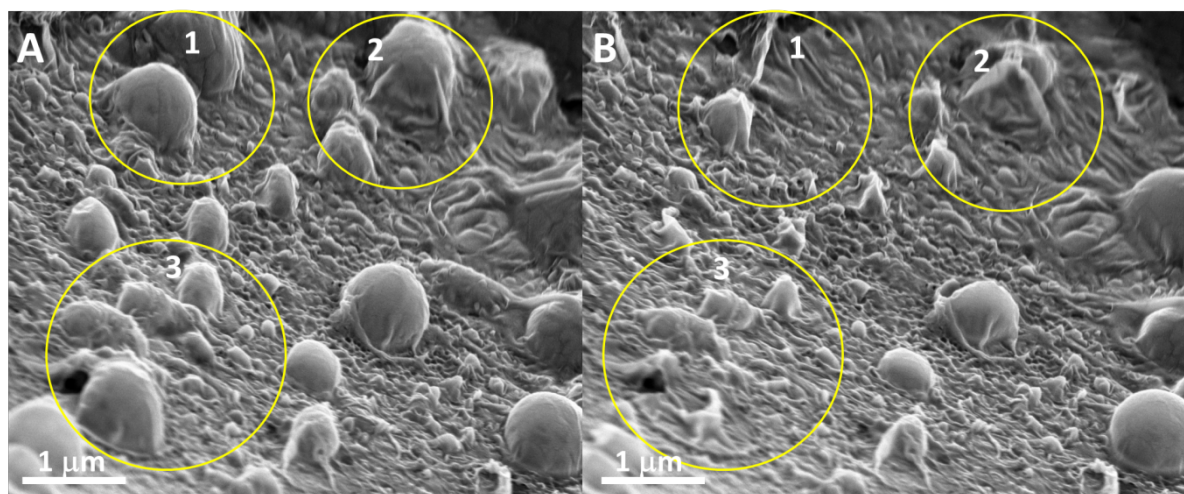

**Fig.1S** A) The thin layered structure of CNS highlighted by the air pockets; B) The air pockets moved and burst under the electron irradiation.

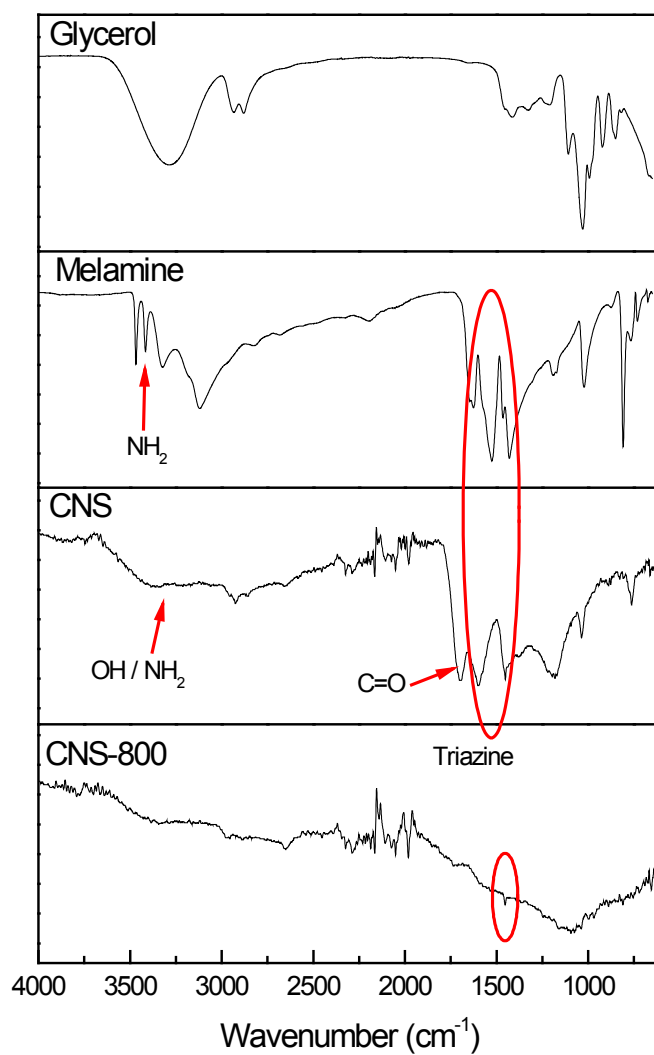

Fig.2S FT-IR spectra of glycerol, melamine, CNS and CNS-800

Table 1S Carbon, oxygen, nitrogen and sulfur atomic percentages from CNS and CNS -800

| Sample name | C atom% | O atom% | N atom% | S atom% | C/O ratio | C/N ratio |
|-------------|---------|---------|---------|---------|-----------|-----------|
| CNS         | 82.65   | 14.49   | 1.75    | 1.11    | 5.70      | 47.23     |
| CNS-800     | 85.81   | 9.09    | 3.33    | 1.77    | 8.44      | 25.77     |

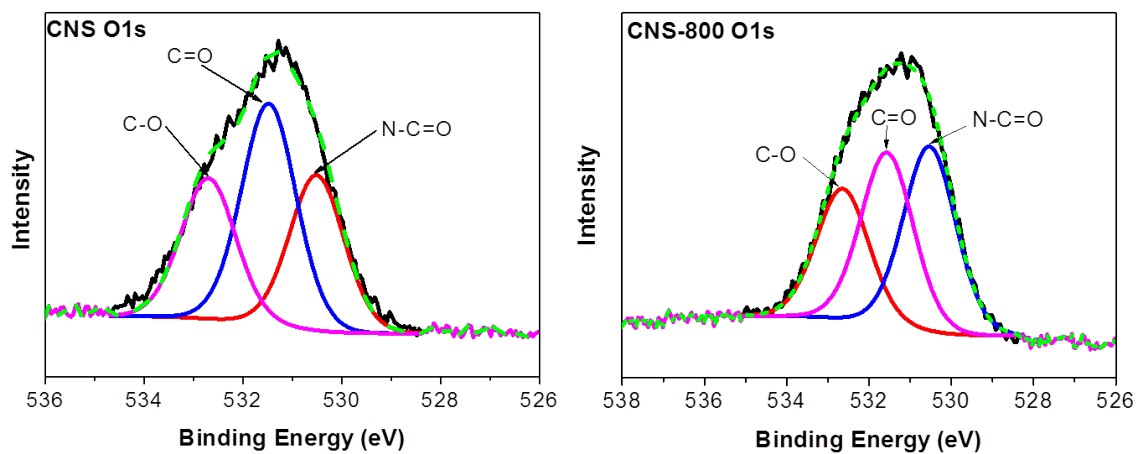

Fig.3S High resolution O 1s spectrum of CNS and CNS-800

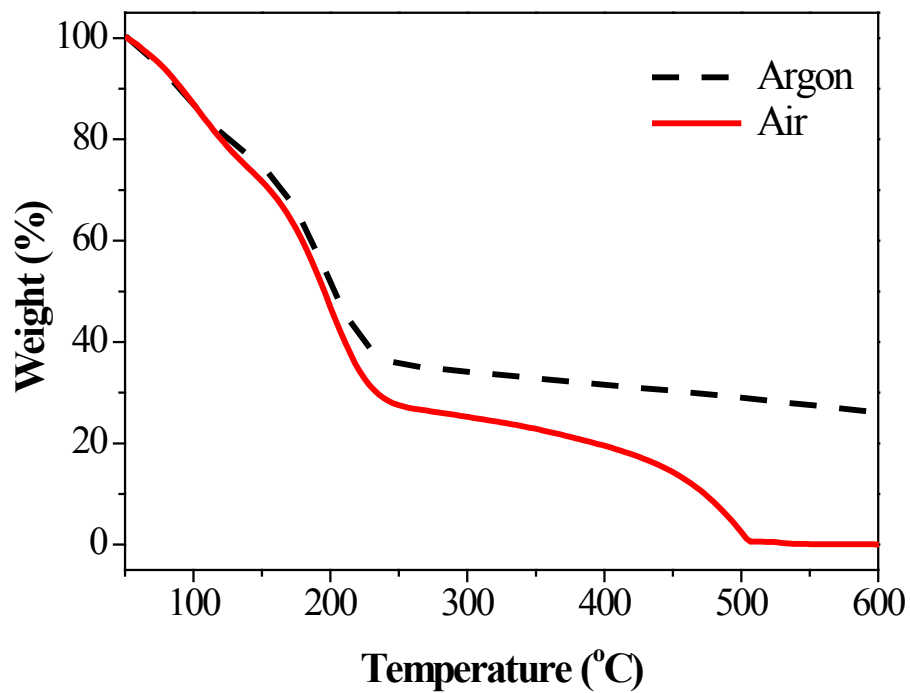

Fig. 4S TGA curves of the CNS performed in Argon and air atmosphere.

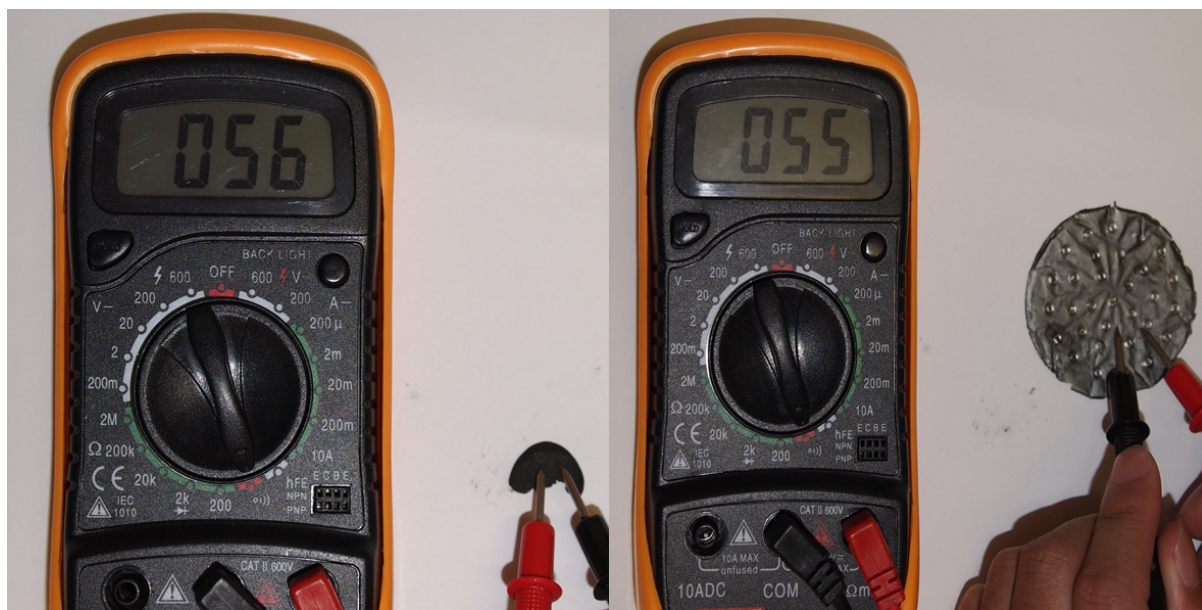

**Fig.5S** Resistance test of CNS-800 (left) and reduced graphene film reduced by HI (right) using a multimeter

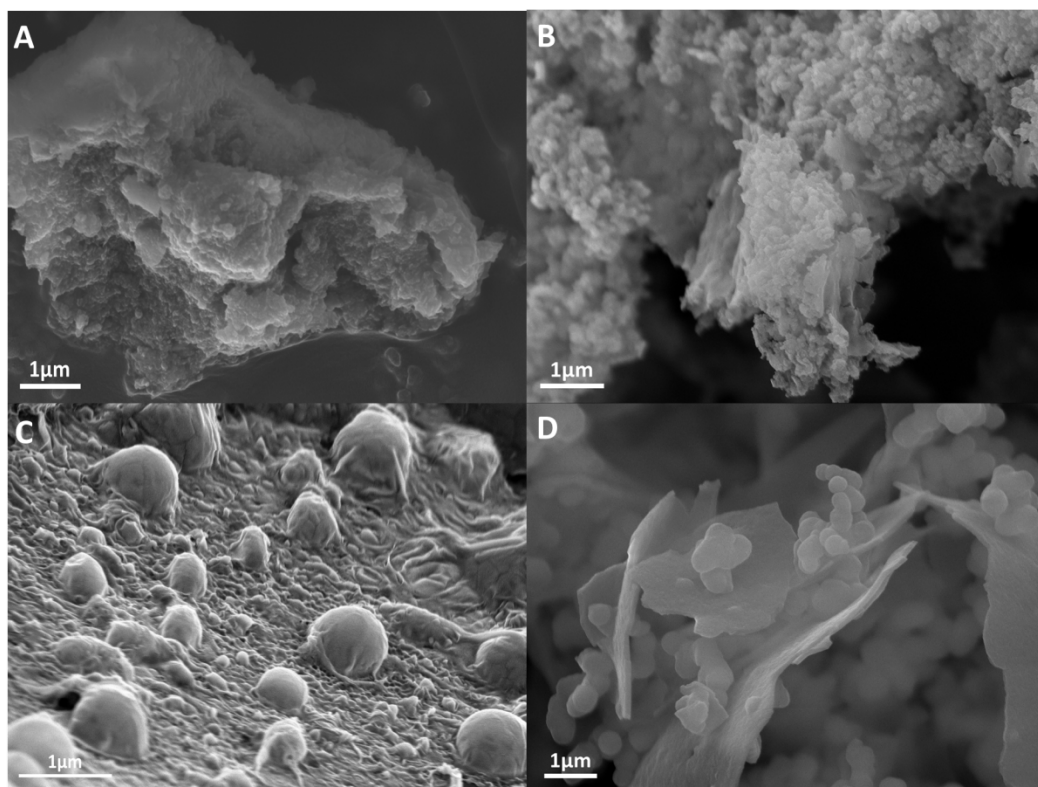

**Fig. 6S** FESEM images of the products prepared under different amount of melamine reacted with 10ml glycerol and 10 ml  $H_2SO_4$ , A) 0 g melamine, B) 0.25 g melamine, C) 0.5 g melamine, and D) 1 g melamine.

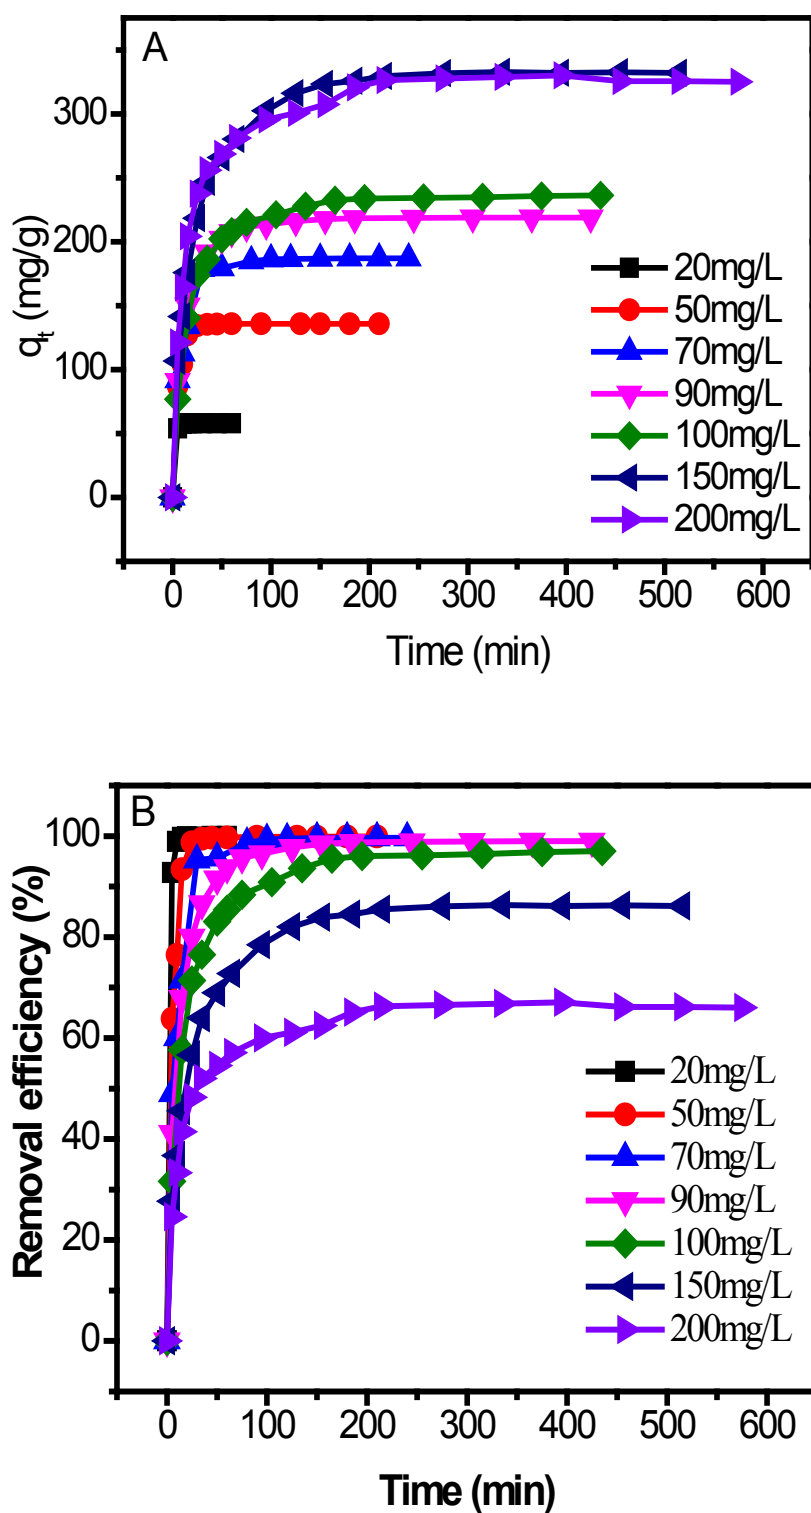

Fig. 7S Dynamic adsorption (A) and removal efficiency (B) of MB at different initial concentration (room temperature, pH=7)

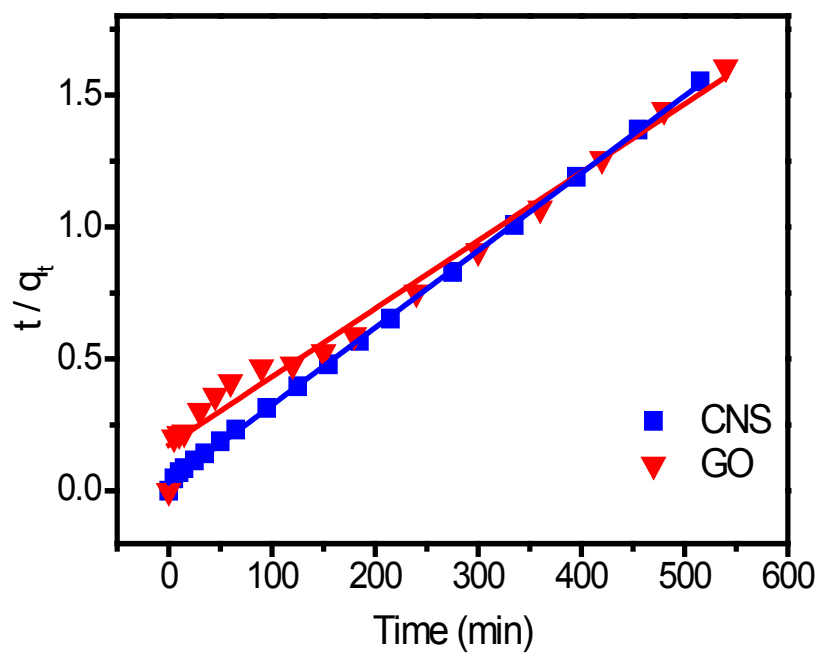

Fig. 8S Pseudo-second-order kinetic fitting curves for adsorption of MB

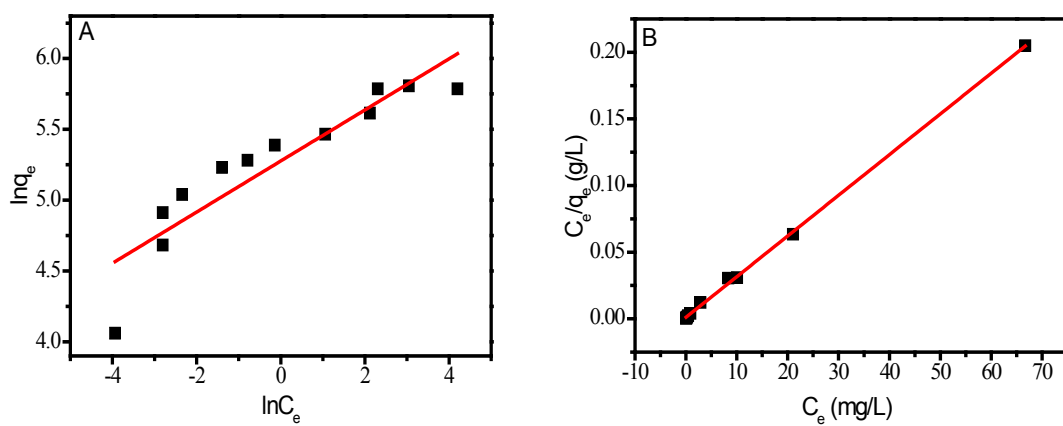

Fig. 9S Linear isotherm plot of Freundlich (A) and Langmuir (B) model of MB onto CNS.
